# Supplementary material for: Stretchable light scattering display based on super strong liquid crystalline physical gels with special loofah-like 3D gel networks
Source: Royal Society of Chemistry journal article supplement (doi:10.1039/c5tc02196k), 2015-01-01
Supplement: c5tc02196k1.pdf [file c5tc02196k1.pdf]

## Supplementary Information

### Stretchable Light Scattering Display Based on Super Strong Liquid Crystalline Physical Gels with Special Loofah-like 3D gel networks

Si Chen, Xiao Luo, Huiwen He, Bozhen Wu, Meng Ma and Xu Wang\*

College of Materials Science and Engineering, Zhejiang University of Technology, NO.18 Chaowang Road, Hangzhou, China. Tel & fax: +86 571 88320855; \*E-mail: wangxu@zjut.edu.cn

#### 1. Schematic illustration of models of the photochemical phase transition

With the UV exposure, photosensitizer 2Azo2 has a trans-cis transition, and such photochemical disordering process could destroy the alignment of the host LC 5CB, which could develop into the nematic-to-isotropic phase transition of the host LC mixture at room temperature, so a transparent state is obtained as a result, as shown in Figure S2(b). While exposing the mixture to a visible light, the photosensitizer 2Azo2 is induced the cis-trans back-isomerization, so that the initial nematic phase of the host LC mixture can be recovered to show the original opaque state, as shown in Figure S2(a). Such a photo-optical behavior makes the azobenzene doped LCs an excellent system for a photo-controllable light scattering display.

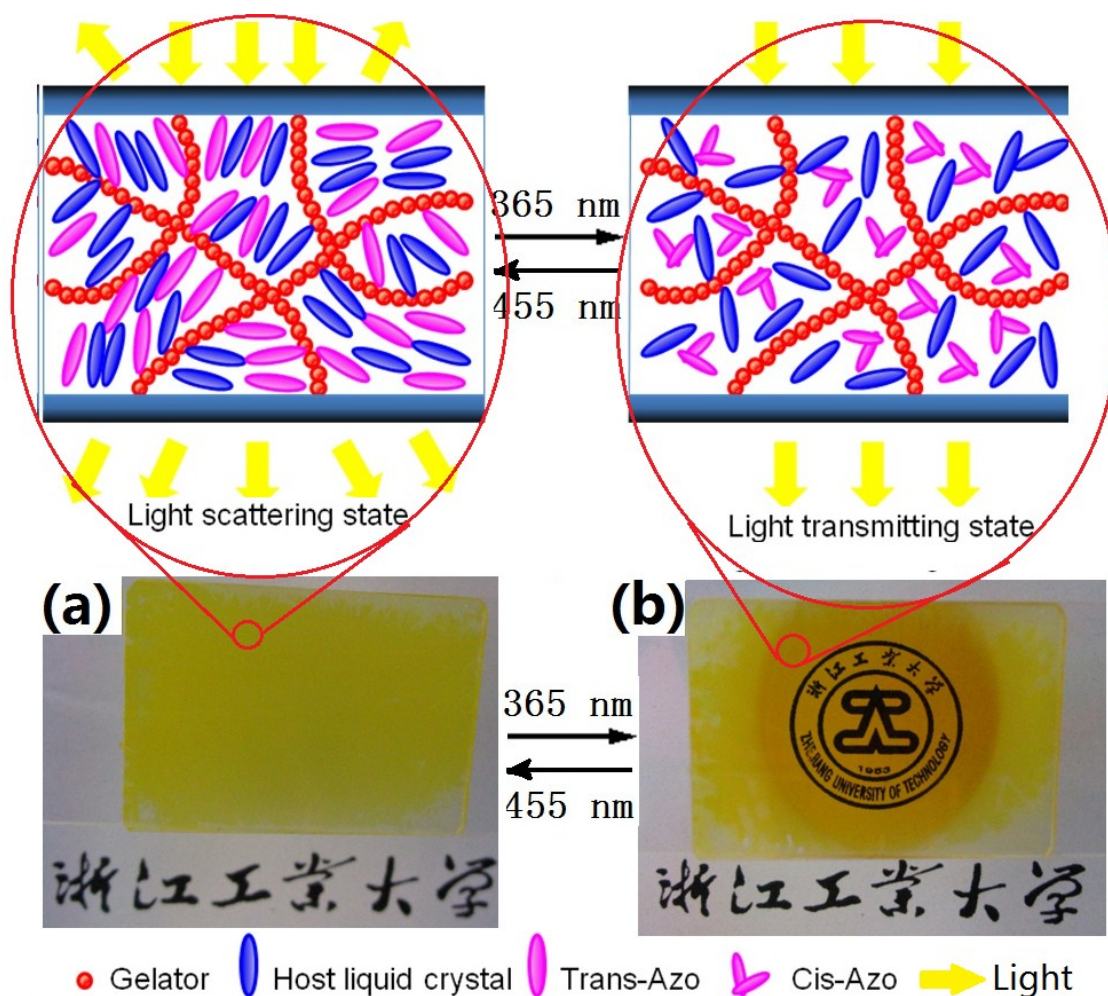

Figure S1 Schematic illustration of models of the photochemical phase transition

#### 2. Operating principle of Liquid Crystal Displays

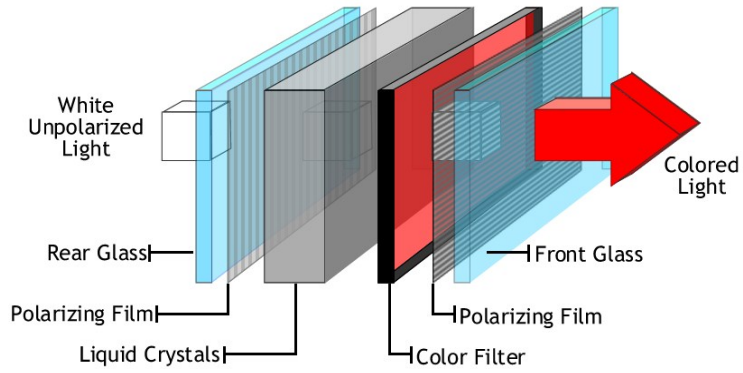

© Lon Koenig

Figure S2 Operating principle of Liquid Crystal Displays<sup>1</sup>

### 3. The on/off cyclability test of the LC gel display device

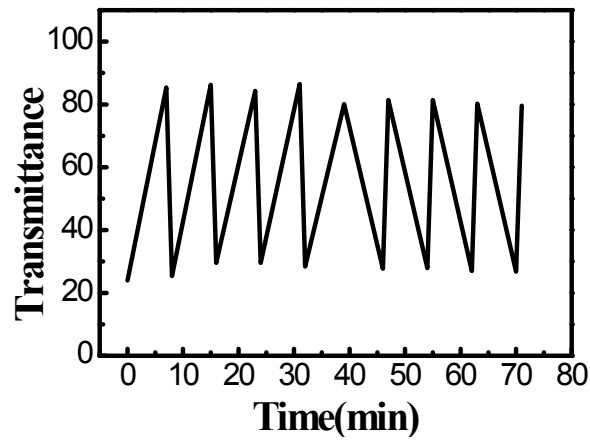

Figure S3 The transparency of UV-vis cyclability test of the LC gel display device

### 4. Larger size LC display

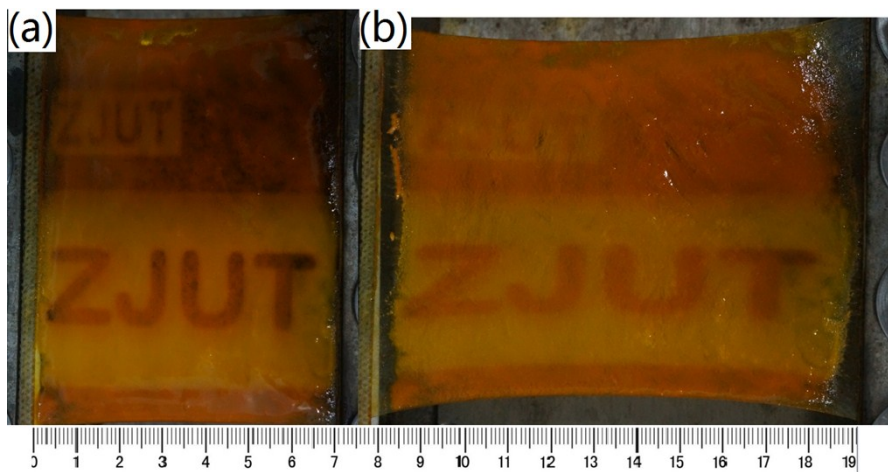

Figure S4 Larger sample ( $7.0 \times 9.4 \text{ cm}^2$ ) with about 10 times area of the sample in Figure 8 ( $3.5 \times 1.8 \text{ cm}^2$ ): (a) the initial state of the display with an effective length of 7.0 cm; (b) the LC display is stretched up to 145% of its original length with an effective length of 10.2 cm.

## References

1. CHEMSTIX , *Tech Reviews*, 2013, FRIDAY, **13**, <http://withfriendship.com/images/b/9673/lcd-pictures-of-liquid.png>
